# Supplementary material
Source: publisher figshare collection journal article supplement (https://springernature.figshare.com/ndownloader/files/13898873)
Supplement: Supplementary file [file 13898873]

**Table S5.** Resistance and susceptibility haplotypes in the candidate blast QTLs identified using *Magnaporthe oryzae* isolate D41-2

| NSFTV ID   | 1          | 3         | 4      | 6      | 8      | 9      | 10     | 13     | 15     | 17     | 18     | 19     | 21    |        |        |
|------------|------------|-----------|--------|--------|--------|--------|--------|--------|--------|--------|--------|--------|-------|--------|--------|
| Population | TEJ        | IND       | AUS    | AUS    | TRJ    | TEJ    | TEJ    | AUS    | TEJ    | IND    | AUS    | AUS    | IND   |        |        |
| D41-2_DLA  | 17.92      | 21.18     | 12.01  | 6.82   | -      | 21.87  | -      | 13.59  | 24.75  | 8.95   | 23.06  | 27.14  | 15.04 |        |        |
| 12YL_DLA   | -          | 30.24     | -      | -      | 5.495  | -      | 11.395 | 18.36  | 24.455 | 2.58   | -      | -      | 7.875 |        |        |
| D41-2_LT   | 4          | 3         | 1      | 0.5    | -      | 1      | -      | 2.3    | 6.3    | 1.7    | 3      | 2.3    | 5     |        |        |
| 12YL_LT    | -          | 8         | -      | -      | 2      | -      | 7      | 6      | 8      | 3      | -      | -      | 3     |        |        |
| QTL        | Population | Phenotype |        |        |        |        |        |        |        |        |        |        |       |        |        |
| D-01       | Indica     | LT        | R-1*** | -      | R-1*** | R-1*** | -      | -      | R-1*** | R-1*** | R-1*** | -      | -     | -      | -      |
| D-02       | Indica     | DLA       | -      | -      | -      | -      | S-1*   | -      | -      | -      | -      | -      | -     | -      | R-1**  |
| D-03       | Full       | DLA       | -      | -      | -      | -      | -      | -      | -      | S-1**  | -      | -      | -     | S-1**  | -      |
| D-04       | Full       | DLA       | -      | -      | -      | -      | S-1**  | -      | S-2*   | -      | S-2*   | -      | -     | -      | -      |
| D-05       | Full       | DLA       | -      | -      | -      | R-3**  | -      | -      | S-1*** | -      | S-1*** | -      | -     | -      | -      |
| D-06       | Full       | DLA       | S-1*** | R-1*** | -      | R-1*** | -      | -      | -      | -      | -      | -      | -     | -      | -      |
| D-07       | Full       | DLA       | S-1*** | -      | R-1*** | R-1*** | R-1*** | S-1*** | S-1*** | R-1*** | S-1*** | -      | -     | -      | -      |
| D-08       | Full       | DLA       | S-1**  | R-1*   | R-2*** | R-2*** | -      | -      | S-1**  | R-2*** | S-1**  | R-1*   | -     | -      | R-1*   |
| D-09       | Full       | DLA       | S-2*   | -      | R-1*** | -      | R-1*** | -      | S-1*** | R-1*** | S-1*** | R-1*** | -     | -      | R-1*** |
| D-10       | Full       | DLA       | S-1*** | -      | -      | -      | -      | -      | S-1*** | -      | S-1*** | -      | -     | -      | -      |
| D-11       | Full       | DLA       | -      | -      | -      | -      | -      | -      | -      | R-1*** | -      | -      | -     | -      | -      |
| D-12       | Full       | DLA       | -      | -      | R-1*** | -      | -      | -      | S-1*** | -      | S-1*** | -      | -     | -      | -      |
| D-13       | Indica     | LT        | -      | -      | -      | -      | -      | -      | -      | S-1*   | -      | -      | -     | R-1**  | -      |
| D-14       | Full       | LT        | S-1*** | R-3*   | -      | -      | -      | -      | S-1*** | S-1*** | -      | R-1*** | R-3*  | R-1*** | R-3*   |
| D-14       | Full       | DLA       | S-1*** | -      | -      | -      | -      | -      | S-1*** | S-1*** | -      | R-1*** | -     | R-1*** | -      |
| D-14       | Indica     | LT        | -      | -      | -      | -      | -      | -      | -      | -      | R-1*** | -      | -     | R-1*** | -      |
| D-15       | Full       | DLA       | -      | -      | R-1*** | -      | -      | -      | -      | -      | -      | -      | -     | R-1*** | -      |
| D-16       | Full       | DLA       | -      | -      | R-1*** | -      | -      | -      | -      | -      | S-2*** | -      | -     | R-1*** | -      |

|            |            |           |        |        |        |        |        |        |        |        |        |        |        |        |        |
|------------|------------|-----------|--------|--------|--------|--------|--------|--------|--------|--------|--------|--------|--------|--------|--------|
| NSFTV ID   | 22         | 24        | 25     | 26     | 27     | 29     | 31     | 32     | 33     | 36     | 37     | 40     | 41     |        |        |
| Population | TRJ        | TRJ       | TRJ    | TRJ    | TRJ    | IND    | TEJ    | TEJ    | AUS    | TEJ    | TRJ    | ADMIX  | ADMIX  |        |        |
| D41-2_DLA  | 17.39      | 11        | 18.26  | 18.67  | 6.8    | 12.26  | 24.87  | 20.39  | 12.16  | 25.51  | 9.45   | 13.92  | 45.36  |        |        |
| 12YL_DLA   | -          | 4.81      | -      | 7.475  | 9.01   | 13.405 | 18.955 | -      | 24.97  | -      | 10.775 | 14.245 | 16.8   |        |        |
| D41-2_LT   | 1          | 1         | 1.7    | 1      | 1.7    | 5      | 6      | 2.3    | 1      | 3      | 1      | 1      | 6      |        |        |
| 12YL_LT    | -          | 6         | -      | 2      | 3      | 3      | 9      | -      | 7      | -      | 6      | 7      | 9      |        |        |
| QTL        | Population | Phenotype |        |        |        |        |        |        |        |        |        |        |        |        |        |
| D-01       | Indica     | LT        | R-1*** | R-1*** | R-1*** | R-1*** | -      | -      | R-1*** | R-1*** | R-1*** | R-1*** | -      | R-1*** | -      |
| D-02       | Indica     | DLA       | S-1*   | S-1*   | -      | S-1*   | S-1*   | -      | -      | -      | S-1*   | S-1*   | -      | S-1*   | S-1*   |
| D-03       | Full       | DLA       | -      | -      | -      | -      | -      | -      | -      | -      | -      | -      | -      | -      | S-1**  |
| D-04       | Full       | DLA       | S-1**  | S-1**  | S-1**  | S-1**  | S-1**  | -      | S-2*   | S-1**  | -      | S-1**  | S-1**  | S-1**  | -      |
| D-05       | Full       | DLA       | -      | -      | -      | -      | R-4*** | -      | S-1*** | S-1*** | -      | -      | -      | S-1*** | -      |
| D-06       | Full       | DLA       | -      | -      | -      | -      | -      | -      | S-1*** | -      | -      | -      | -      | -      | -      |
| D-07       | Full       | DLA       | R-1*** | R-1*** | R-1*** | R-1*** | R-1*** | -      | S-1*** | S-1*** | R-1*** | S-1*** | R-1*** | R-1*** | R-1*** |
| D-08       | Full       | DLA       | -      | -      | -      | -      | -      | -      | S-1**  | S-1**  | R-2*** | S-1**  | -      | -      | -      |
| D-09       | Full       | DLA       | R-1*** | R-1*** | R-1*** | R-1*** | R-1*** | R-1*** | S-1*** | S-1*** | R-1*** | S-1*** | R-1*** | R-1*** | R-1*** |
| D-10       | Full       | DLA       | -      | -      | -      | -      | -      | -      | -      | S-1*** | -      | -      | -      | -      | -      |
| D-11       | Full       | DLA       | -      | -      | -      | -      | -      | -      | S-1*** | -      | -      | -      | -      | -      | S-2**  |
| D-12       | Full       | DLA       | -      | -      | -      | -      | -      | -      | S-1*** | -      | -      | -      | -      | S-1*** | -      |
| D-13       | Indica     | LT        | -      | -      | -      | -      | -      | -      | -      | -      | -      | -      | -      | -      | -      |
| D-14       | Full       | LT        | -      | R-2*** | -      | -      | S-1*** | -      | S-1*** | S-1*** | R-1*** | R-2*** | S-1*** | R-2*** | S-1*** |
| D-14       | Full       | DLA       | -      | -      | -      | -      | S-1*** | -      | S-1*** | S-1*** | R-1*** | -      | S-1*** | -      | S-1*** |
| D-14       | Indica     | LT        | -      | -      | -      | -      | -      | -      | -      | -      | R-1*** | -      | -      | -      | -      |
| D-15       | Full       | DLA       | -      | -      | -      | -      | -      | -      | -      | -      | -      | -      | -      | -      | -      |
| D-16       | Full       | DLA       | -      | -      | -      | -      | -      | -      | S-1*   | -      | R-1*** | -      | -      | -      | -      |

|            |            |           |        |        |        |        |        |        |        |        |        |        |        |        |
|------------|------------|-----------|--------|--------|--------|--------|--------|--------|--------|--------|--------|--------|--------|--------|
| NSFTV ID   | 44         | 45        | 46     | 49     | 50     | 51     | 55     | 58     | 59     | 60     | 62     | 63     | 64     |        |
| Population | AUS        | AROMATIC  | TRJ    | AUS    | AUS    | TEJ    | ADMIX  | AUS    | TRJ    | ADMIX  | TEJ    | TEJ    | TEJ    |        |
| D41-2_DLA  | 20.78      | 2.19      | 10.21  | 18.06  | 6.29   | 33.63  | 18.04  | 23.82  | 8.41   | 23.73  | 12.9   | 6.42   | 22.43  |        |
| 12YL_DLA   | 32.56      | -         | 18.995 | -      | 9.25   | 13.745 | -      | -      | 11.79  | 19.88  | 0.47   | -      | 18.53  |        |
| D41-2_LT   | 2.3        | 1         | 3.7    | 3      | 1      | 5.7    | 5.3    | 6.3    | 0.3    | 5.7    | 2      | 7      | 7.7    |        |
| 12YL_LT    | 4          | -         | 7      | -      | 3      | 9      | -      | -      | 7      | 7      | 1      | -      | 8      |        |
| QTL        | Population | Phenotype |        |        |        |        |        |        |        |        |        |        |        |        |
| D-01       | Indica     | LT        | -      | R-1*** | R-1*** | -      | S-1*   | -      | -      | -      | R-1*** | R-1*** | -      | R-1*** |
| D-02       | Indica     | DLA       | -      | S-2**  | S-1*   | S-2**  | -      | -      | S-2**  | S-1*   | -      | -      | -      | -      |
| D-03       | Full       | DLA       | S-1**  | -      | -      | S-1**  | -      | -      | S-1**  | -      | -      | -      | -      | -      |
| D-04       | Full       | DLA       | R-1*** | -      | S-1**  | -      | -      | -      | -      | S-1**  | -      | -      | -      | S-1**  |
| D-05       | Full       | DLA       | -      | S-1*** | -      | -      | -      | -      | -      | -      | -      | S-1*** | -      | -      |
| D-06       | Full       | DLA       | -      | -      | -      | -      | -      | -      | R-1*** | -      | S-1*** | S-1*** | S-1*** | -      |
| D-07       | Full       | DLA       | R-1*** | S-1*** | R-1*** | -      | -      | S-1*** | S-1*** | -      | R-1*** | -      | R-1*** | S-1*** |
| D-08       | Full       | DLA       | R-2*** | S-1**  | -      | -      | -      | -      | R-2*** | -      | -      | -      | S-1**  | S-1**  |
| D-09       | Full       | DLA       | R-1*** | S-2*   | R-1*** | -      | R-1*** | S-1*** | -      | -      | R-1*** | S-1*** | S-1*** | S-1*** |
| D-10       | Full       | DLA       | -      | -      | -      | -      | -      | -      | -      | -      | S-1*** | -      | S-1*** | -      |
| D-11       | Full       | DLA       | -      | -      | -      | -      | -      | -      | -      | -      | -      | -      | -      | -      |
| D-12       | Full       | DLA       | R-1*** | -      | -      | -      | -      | -      | -      | -      | -      | S-1*** | -      | -      |
| D-13       | Indica     | LT        | -      | S-1*   | -      | -      | -      | -      | -      | -      | -      | -      | -      | -      |
| D-14       | Full       | LT        | R-3*   | -      | S-1*** | -      | R-1*** | -      | -      | -      | -      | -      | -      | S-1*** |
| D-14       | Full       | DLA       | -      | -      | S-1*** | -      | R-1*** | -      | -      | -      | -      | -      | -      | S-1*** |
| D-14       | Indica     | LT        | -      | -      | -      | -      | R-1*** | -      | -      | -      | -      | -      | -      | -      |
| D-15       | Full       | DLA       | R-1*** | -      | -      | -      | R-1*** | -      | -      | R-1*** | -      | S-1*** | -      | -      |
| D-16       | Full       | DLA       | R-1*** | R-1*** | -      | -      | R-1*** | -      | -      | R-1*** | -      | S-1*   | -      | S-1*   |

[illegible]

[illegible]

|            |            |           |        |        |        |        |        |        |        |        |        |        |        |        |
|------------|------------|-----------|--------|--------|--------|--------|--------|--------|--------|--------|--------|--------|--------|--------|
| NSFTV ID   | 98         | 99        | 100    | 101    | 103    | 104    | 105    | 107    | 109    | 110    | 113    | 114    |        |        |
| Population | TRJ        | TRJ       | ADMIX  | TRJ    | TEJ    | TEJ    | AUS    | TRJ    | IND    | IND    | TEJ    | ADMIX  |        |        |
| D41-2_DLA  | 13.94      | 8.79      | 14.39  | -      | 30.83  | 28.35  | 12.79  | 7.48   | 10.15  | 8.41   | 12.38  | 8.7    |        |        |
| 12YL_DLA   | 32.155     | 4.08      | -      | 1.035  | 13.505 | 6.045  | -      | -      | 13.555 | 25.07  | 29.875 | -      |        |        |
| D41-2_LT   | 5.3        | 2.3       | 4.3    | -      | 8.3    | 6      | 1.7    | 1.7    | 6.3    | 1      | 6.3    | 4.3    |        |        |
| 12YL_LT    | 8          | 2         | -      | 1      | 9      | 3      | -      | -      | 5      | 6      | 9      | -      |        |        |
| QTL        | Population | Phenotype |        |        |        |        |        |        |        |        |        |        |        |        |
| D-01       | Indica     | LT        | R-1*** | R-1*** | -      | R-1*** | R-1*** | R-1*** | R-1*** | -      | -      | -      | R-1*** | R-1*** |
| D-02       | Indica     | DLA       | S-2**  | S-1*   | S-1*   | S-1*   | -      | -      | -      | S-1*   | S-1*   | -      | -      | S-1*   |
| D-03       | Full       | DLA       | -      | -      | -      | -      | -      | -      | -      | -      | -      | -      | -      | -      |
| D-04       | Full       | DLA       | S-1**  | S-1**  | S-1**  | S-1**  | S-2*   | S-1**  | -      | S-1**  | -      | R-1*** | S-1**  | S-1**  |
| D-05       | Full       | DLA       | -      | -      | -      | -      | S-1*** | S-1*** | -      | -      | R-1*   | R-1*   | S-1*** | S-1*** |
| D-06       | Full       | DLA       | S-1*** | -      | -      | -      | S-1*** | -      | R-1*** | -      | R-1*** | -      | -      | -      |
| D-07       | Full       | DLA       | R-1*** | R-1*** | R-1*** | R-1*** | S-1*** | S-1*** | R-1*** | R-1*** | -      | -      | S-1*** | R-1*** |
| D-08       | Full       | DLA       | -      | -      | S-1**  | -      | S-1**  | S-1**  | R-2*** | -      | -      | R-1*   | -      | -      |
| D-09       | Full       | DLA       | R-1*** | R-1*** | S-1*** | R-1*** | S-1*** | R-1*** | -      | R-1*** | R-1*** | R-1*** | -      | R-1*** |
| D-10       | Full       | DLA       | -      | -      | -      | -      | -      | -      | -      | -      | -      | -      | S-2**  | -      |
| D-11       | Full       | DLA       | -      | -      | -      | -      | S-1*** | S-2**  | -      | -      | -      | -      | -      | -      |
| D-12       | Full       | DLA       | -      | -      | -      | -      | -      | S-1*** | -      | -      | -      | -      | S-1*** | -      |
| D-13       | Indica     | LT        | -      | -      | -      | -      | -      | -      | -      | -      | -      | -      | -      | -      |
| D-14       | Full       | LT        | S-1*** | R-2*** | S-1*** | -      | -      | S-1*** | -      | S-1*** | -      | -      | -      | S-1*** |
| D-14       | Full       | DLA       | S-1*** | -      | S-1*** | -      | -      | S-1*** | -      | S-1*** | -      | -      | -      | S-1*** |
| D-14       | Indica     | LT        | -      | -      | -      | -      | -      | -      | -      | -      | -      | -      | -      | -      |
| D-15       | Full       | DLA       | -      | -      | -      | -      | -      | -      | -      | -      | -      | -      | -      | S-1*** |
| D-16       | Full       | DLA       | -      | -      | -      | -      | -      | S-1*   | -      | -      | -      | -      | -      | S-1*   |

[illegible]

|            |            |           |        |        |        |        |        |        |        |        |        |        |        |        |
|------------|------------|-----------|--------|--------|--------|--------|--------|--------|--------|--------|--------|--------|--------|--------|
| NSFTV ID   | 139        | 140       | 141    | 143    | 144    | 145    | 146    | 148    | 150    | 151    | 152    | 153    |        |        |
| Population | TRJ        | ADMIX     | IND    | TEJ    | TEJ    | IND    | IND    | IND    | TRJ    | TEJ    | AUS    | AUS    |        |        |
| D41-2_DLA  | 9.47       | 25.25     | 15.98  | 30.02  | 20.46  | 14.86  | 24.03  | 10.8   | 20.58  | 3.55   | 15.98  | 6.85   |        |        |
| 12YL_DLA   | 10.995     | -         | 20.375 | 23.205 | 8.635  | 8.105  | 14.165 | 7.24   | 15.725 | 4.94   | 4.45   | -      |        |        |
| D41-2_LT   | 4.7        | 6.3       | 6.3    | 9      | 6.3    | 1.7    | 2.3    | 6.3    | 5.7    | 1      | 2.3    | 1.7    |        |        |
| 12YL_LT    | 6          | -         | 2      | 9      | 7      | 1      | 2      | 1      | 7      | 1      | 3      | -      |        |        |
| QTL        | Population | Phenotype |        |        |        |        |        |        |        |        |        |        |        |        |
| D-01       | Indica     | LT        | R-1*** | R-1*** | -      | R-1*** | R-1*** | -      | -      | -      | R-1*** | R-1*** | R-1*** | R-1*** |
| D-02       | Indica     | DLA       | S-1*   | S-1*   | -      | -      | -      | -      | -      | -      | S-1*   | -      | S-1*   | -      |
| D-03       | Full       | DLA       | -      | -      | -      | -      | -      | -      | -      | -      | -      | -      | -      | S-1**  |
| D-04       | Full       | DLA       | -      | S-1**  | -      | -      | S-2*   | R-1*** | -      | -      | -      | S-2*   | R-1*** | R-1*** |
| D-05       | Full       | DLA       | -      | -      | -      | S-1*** | S-1*** | -      | -      | -      | S-1*** | -      | -      | -      |
| D-06       | Full       | DLA       | S-1*** | -      | -      | S-1*** | -      | -      | -      | R-1*** | S-1*** | -      | R-1*** | -      |
| D-07       | Full       | DLA       | R-1*** | R-1*** | -      | S-1*** | S-1*** | -      | -      | -      | R-1*** | S-1*** | R-1*** | R-1*** |
| D-08       | Full       | DLA       | -      | -      | R-3**  | S-1**  | S-1**  | R-1*   | -      | -      | -      | S-1**  | R-2*** | R-2*** |
| D-09       | Full       | DLA       | R-1*** | R-1*** | R-1*** | S-1*** | S-1*** | R-1*** | S-2*   | -      | R-1*** | S-1*** | R-1*** | -      |
| D-10       | Full       | DLA       | -      | -      | -      | S-1*** | -      | -      | -      | -      | -      | S-1*** | -      | -      |
| D-11       | Full       | DLA       | -      | -      | -      | -      | -      | -      | -      | -      | -      | S-1*** | -      | -      |
| D-12       | Full       | DLA       | -      | -      | -      | -      | -      | -      | -      | -      | -      | S-1*** | R-1*** | R-1*** |
| D-13       | Indica     | LT        | -      | -      | -      | -      | -      | -      | -      | -      | -      | -      | -      | -      |
| D-14       | Full       | LT        | S-1*** | S-1*** | -      | S-1*** | S-1*** | -      | R-3*   | -      | S-1*** | -      | -      | -      |
| D-14       | Full       | DLA       | S-1*** | S-1*** | -      | S-1*** | S-1*** | -      | -      | -      | S-1*** | -      | -      | -      |
| D-14       | Indica     | LT        | -      | -      | -      | -      | -      | -      | -      | -      | -      | -      | R-1*** | -      |
| D-15       | Full       | DLA       | -      | -      | -      | -      | S-1*** | -      | -      | -      | -      | -      | -      | R-1*** |
| D-16       | Full       | DLA       | -      | -      | -      | S-2*** | S-2*** | -      | -      | -      | -      | -      | R-1*** | R-1*** |



|            |            |           |        |        |          |        |        |        |       |        |        |        |        |
|------------|------------|-----------|--------|--------|----------|--------|--------|--------|-------|--------|--------|--------|--------|
| NSFTV ID   | 154        | 155       | 156    | 157    | 160      | 161    | 162    | 165    | 166   | 167    | 169    | 171    |        |
| Population | TEJ        | TEJ       | IND    | TEJ    | AROMATIC | IND    | IND    | TRJ    | ADMIX | TRJ    | TEJ    | IND    |        |
| D41-2_DLA  | 35.49      | 30.42     | 15.96  | 17.11  | 5.1      | 9.64   | 23.38  | 8.57   | 23.7  | 2.29   | 7.15   | 10.4   |        |
| 12YL_DLA   | 9.77       | 12.07     | 2.955  | 13.9   | -        | 0.045  | 11.055 | 7.93   | -     | 19.16  | -      | 7.045  |        |
| D41-2_LT   | 6          | 8         | 7      | 7      | 1.7      | 1.3    | 6.3    | 0.7    | 7     | 1      | 1.7    | 3      |        |
| 12YL_LT    | 9          | 5         | 2      | 9      | -        | 1      | 6      | 7      | -     | 8      | -      | 2      |        |
| QTL        | Population | Phenotype |        |        |          |        |        |        |       |        |        |        |        |
| D-01       | Indica     | LT        | R-1*** | R-1*** | -        | R-1*** | R-1*** | -      | -     | -      | R-1*** | -      | -      |
| D-02       | Indica     | DLA       | -      | S-1*   | -        | -      | S-2**  | -      | -     | -      | S-1*   | S-2**  | -      |
| D-03       | Full       | DLA       | -      | -      | -        | -      | S-1**  | -      | -     | S-1**  | -      | -      | -      |
| D-04       | Full       | DLA       | -      | -      | -        | S-2*   | -      | -      | S-1** | -      | S-1**  | S-2*   | -      |
| D-05       | Full       | DLA       | -      | -      | -        | S-1*** | S-1*** | R-1*   | -     | -      | -      | -      | -      |
| D-06       | Full       | DLA       | -      | -      | R-1***   | S-1*** | -      | R-1*** | -     | -      | -      | -      | -      |
| D-07       | Full       | DLA       | S-1*** | S-1*** | -        | R-1*** | R-1*** | -      | -     | -      | R-1*** | R-1*** | -      |
| D-08       | Full       | DLA       | S-2**  | -      | R-1*     | -      | R-3**  | R-1*   | -     | -      | -      | -      | -      |
| D-09       | Full       | DLA       | S-2*   | S-2*   | R-1***   | R-1*** | R-1*** | R-1*** | -     | R-1*** | -      | R-1*** | R-1*** |
| D-10       | Full       | DLA       | S-2**  | -      | -        | -      | -      | -      | -     | -      | -      | -      | -      |
| D-11       | Full       | DLA       | -      | -      | -        | -      | -      | -      | -     | -      | -      | -      | -      |
| D-12       | Full       | DLA       | -      | -      | -        | -      | -      | -      | -     | -      | -      | -      | -      |
| D-13       | Indica     | LT        | -      | -      | -        | -      | S-1*   | -      | -     | -      | -      | -      | -      |
| D-14       | Full       | LT        | S-1*** | S-1*** | R-3*     | S-1*** | -      | -      | -     | -      | S-1*** | -      | R-3*   |
| D-14       | Full       | DLA       | S-1*** | S-1*** | -        | S-1*** | -      | -      | -     | -      | S-1*** | -      | -      |
| D-14       | Indica     | LT        | -      | -      | -        | -      | -      | -      | -     | -      | -      | -      | -      |
| D-15       | Full       | DLA       | -      | -      | -        | -      | -      | -      | -     | -      | -      | -      | -      |
| D-16       | Full       | DLA       | -      | -      | -        | -      | R-1*** | -      | -     | -      | -      | -      | -      |

|            |            |           |        |        |        |        |        |        |        |        |        |        |        |        |
|------------|------------|-----------|--------|--------|--------|--------|--------|--------|--------|--------|--------|--------|--------|--------|
| NSFTV ID   | 172        | 173       | 174    | 178    | 179    | 180    | 181    | 182    | 183    | 185    | 186    | 187    |        |        |
| Population | IND        | TEJ       | TRJ    | AUS    | TEJ    | TEJ    | TEJ    | ADMIX  | TRJ    | TRJ    | TEJ    | TRJ    |        |        |
| D41-2_DLA  | 6.55       | 28.62     | 11.65  | 16.67  | 24.1   | 21.69  | 18.83  | 40.14  | 6.64   | 25.09  | 27.37  | 21.84  |        |        |
| 12YL_DLA   | 3.365      | -         | 14.845 | -      | -      | 9.205  | 22.585 | -      | 2.25   | -      | 16.575 | 15.75  |        |        |
| D41-2_LT   | 5          | 8.3       | 5.3    | 1.7    | 7      | 9      | 8.3    | 7      | 3      | 4.3    | 8.3    | 8      |        |        |
| 12YL_LT    | 1          | -         | 6      | -      | -      | 8      | 8      | -      | 1      | -      | 9      | 8      |        |        |
| QTL        | Population | Phenotype |        |        |        |        |        |        |        |        |        |        |        |        |
| D-01       | Indica     | LT        | -      | R-1*** | R-1*** | -      | -      | R-1*** | R-1*** | R-1*** | R-1*** | R-1*** | R-1*** | R-1*** |
| D-02       | Indica     | DLA       | -      | -      | -      | -      | -      | -      | S-1*   | S-1*   | S-1*   | -      | S-2**  |        |
| D-03       | Full       | DLA       | -      | -      | -      | -      | -      | -      | -      | -      | -      | -      | -      |        |
| D-04       | Full       | DLA       | -      | S-2*   | S-1**  | -      | -      | S-2*   | -      | S-1**  | S-1**  | S-1**  | S-2*   | S-1**  |
| D-05       | Full       | DLA       | -      | S-1*** | -      | -      | S-1*** | S-1*** | -      | S-1*** | -      | -      | S-1*** | -      |
| D-06       | Full       | DLA       | R-1*** | S-1*** | -      | R-1*** | S-1*** | S-1*** | -      | S-1*** | -      | -      | S-1*** | -      |
| D-07       | Full       | DLA       | -      | S-1*** | R-1*** | R-1*** | S-1*** | S-1*** | S-1*** | R-1*** | R-1*** | R-1*** | S-1*** | R-1*** |
| D-08       | Full       | DLA       | R-1*   | S-1**  | -      | R-2*** | S-1**  | S-1**  | S-1**  | -      | -      | -      | S-1**  | -      |
| D-09       | Full       | DLA       | -      | S-1*** | R-1*** | -      | S-2*   | S-1*** | S-1*** | R-1*** | R-1*** | R-1*** | S-1*** | R-1*** |
| D-10       | Full       | DLA       | -      | S-1*** | -      | -      | S-2**  | S-1*** | S-1*** | -      | -      | -      | -      | -      |
| D-11       | Full       | DLA       | -      | -      | -      | -      | S-2**  | -      | -      | -      | -      | -      | S-1*** | -      |
| D-12       | Full       | DLA       | -      | S-1*** | -      | -      | -      | S-1*** | -      | -      | -      | -      | -      | -      |
| D-13       | Indica     | LT        | -      | -      | -      | R-1**  | -      | -      | -      | -      | -      | -      | -      | -      |
| D-14       | Full       | LT        | R-3*   | S-1*** | -      | -      | S-1*** | S-1*** | S-1*** | S-1*** | S-1*** | -      | S-1*** | S-1*** |
| D-14       | Full       | DLA       | -      | S-1*** | -      | -      | S-1*** | S-1*** | S-1*** | S-1*** | S-1*** | -      | S-1*** | S-1*** |
| D-14       | Indica     | LT        | -      | -      | -      | -      | -      | -      | -      | -      | -      | -      | -      | -      |
| D-15       | Full       | DLA       | -      | -      | -      | R-1*** | S-1*** | S-1*** | -      | -      | -      | -      | -      | -      |
| D-16       | Full       | DLA       | -      | S-1*   | -      | -      | S-1*   | S-2*** | -      | -      | -      | -      | S-1*   | -      |

|            |            |           |        |        |        |        |        |        |        |        |        |        |        |        |        |
|------------|------------|-----------|--------|--------|--------|--------|--------|--------|--------|--------|--------|--------|--------|--------|--------|
| NSFTV ID   | 189        | 191       | 195    | 197    | 198    | 199    | 200    | 202    | 204    | 205    | 208    | 209    | 213    |        |        |
| Population | IND        | AROMATIC  | TRJ    | ADMIX  | TRJ    | TRJ    | AUS    | TRJ    | TEJ    | ADMIX  | IND    | IND    | TRJ    |        |        |
| D41-2_DLA  | 11.41      | 8.67      | 5.53   | 12.65  | 8.9    | 8.77   | 9.59   | 4.38   | 30.51  | 21.17  | 8.55   | 7.05   | 13.25  |        |        |
| 12YL_DLA   | 14.045     | -         | 10.39  | 13.68  | 22.715 | 6.74   | 17.455 | 9.24   | -      | 16.35  | 9.03   | 6.1    | 14.555 |        |        |
| D41-2_LT   | 7          | 1.5       | 1.7    | 2.3    | 1      | 2      | 3      | 2      | 7      | 7      | 2.3    | 2.3    | 5      |        |        |
| 12YL_LT    | 6          | -         | 3      | 5      | 8      | 1      | 3      | 1      | -      | 7      | 3      | 2      | 8      |        |        |
| QTL        | Population | Phenotype |        |        |        |        |        |        |        |        |        |        |        |        |        |
| D-01       | Indica     | LT        | -      | R-1*** | -      | R-1*** | R-1*** | -      | -      | R-1*** | -      | R-1*** | -      | -      | R-1*** |
| D-02       | Indica     | DLA       | -      | S-2**  | S-1*   | S-2**  | S-1*   | S-1*   | S-1*   | S-1*   | S-1*   | -      | -      | -      | S-1*   |
| D-03       | Full       | DLA       | -      | -      | -      | -      | -      | -      | S-1**  | -      | -      | -      | -      | -      | -      |
| D-04       | Full       | DLA       | R-1*** | -      | S-1**  | S-1**  | S-1**  | S-1**  | -      | S-1**  | -      | -      | -      | R-1*** | -      |
| D-05       | Full       | DLA       | -      | S-1*** | -      | S-1*** | -      | -      | -      | -      | -      | -      | R-1*   | -      | -      |
| D-06       | Full       | DLA       | R-1*** | -      | -      | -      | -      | -      | -      | -      | -      | -      | R-1*** | -      | -      |
| D-07       | Full       | DLA       | -      | S-1*** | R-1*** | R-1*** | R-1*** | R-1*** | -      | R-1*** | S-1*** | R-1*** | -      | -      | -      |
| D-08       | Full       | DLA       | R-1*   | S-1**  | -      | -      | -      | -      | -      | -      | S-2**  | -      | R-1*   | -      | -      |
| D-09       | Full       | DLA       | -      | S-2*   | R-1*** | R-1*** | R-1*** | R-1*** | -      | R-1*** | S-2*   | R-1*** | R-1*** | -      | R-1*** |
| D-10       | Full       | DLA       | -      | -      | -      | -      | -      | -      | -      | -      | -      | -      | -      | -      | -      |
| D-11       | Full       | DLA       | -      | -      | -      | -      | -      | -      | -      | -      | -      | -      | R-1*** | -      | -      |
| D-12       | Full       | DLA       | -      | -      | -      | S-1*** | -      | -      | -      | -      | S-1*** | -      | -      | -      | -      |
| D-13       | Indica     | LT        | -      | S-1*   | -      | -      | -      | -      | R-1**  | -      | -      | -      | -      | -      | -      |
| D-14       | Full       | LT        | R-3*   | -      | -      | R-2*** | -      | -      | R-1*** | S-1*** | S-1*** | S-1*** | -      | -      | S-1*** |
| D-14       | Full       | DLA       | -      | -      | -      | -      | -      | -      | R-1*** | S-1*** | S-1*** | S-1*** | -      | -      | S-1*** |
| D-14       | Indica     | LT        | -      | -      | -      | -      | -      | -      | R-1*** | -      | -      | -      | -      | -      | -      |
| D-15       | Full       | DLA       | -      | R-1*** | -      | -      | -      | -      | R-1*** | -      | -      | -      | -      | -      | -      |
| D-16       | Full       | DLA       | -      | R-1*** | -      | -      | -      | -      | R-1*** | -      | -      | -      | -      | -      | -      |

|            |            |           |        |        |        |        |        |        |       |        |        |        |        |        |
|------------|------------|-----------|--------|--------|--------|--------|--------|--------|-------|--------|--------|--------|--------|--------|
| NSFTV ID   | 215        | 216       | 217    | 218    | 219    | 220    | 222    | 223    | 224   | 226    | 227    | 228    | 229    |        |
| Population | TRJ        | TEJ       | ADMIX  | ADMIX  | TEJ    | TEJ    | IND    | TRJ    | TEJ   | TRJ    | ADMIX  | AUS    | TRJ    |        |
| D41-2_DLA  | 6.91       | 23.72     | 20.42  | 10.53  | 23.53  | 21.62  | 14.17  | 6.3    | 37.45 | 6.77   | 7.95   | 10.37  | 37.52  |        |
| 12YL_DLA   | -          | -         | 18.395 | 13.215 | -      | 16.83  | 14.62  | 4.75   | 34.96 | 6.275  | 4.49   | -      | 22.215 |        |
| D41-2_LT   | 3          | 7.7       | 8.3    | 3      | 8.3    | 8.3    | 6      | 3      | 8.3   | 1.7    | 1      | 4.3    | 6      |        |
| 12YL_LT    | -          | -         | 9      | 9      | -      | 8      | 7      | 3      | 9     | 3      | 1      | -      | 7      |        |
| QTL        | Population | Phenotype |        |        |        |        |        |        |       |        |        |        |        |        |
| D-01       | Indica     | LT        | -      | -      | -      | -      | -      | -      | -     | R-1*** | -      | -      | -      | R-1*** |
| D-02       | Indica     | DLA       | S-1*   | -      | -      | S-2**  | S-1*   | -      | -     | S-1*   | -      | -      | -      | S-1*   |
| D-03       | Full       | DLA       | -      | -      | -      | -      | -      | -      | -     | -      | -      | S-1**  | -      | -      |
| D-04       | Full       | DLA       | -      | -      | -      | S-1**  | S-1**  | -      | -     | S-1**  | S-1**  | -      | -      | -      |
| D-05       | Full       | DLA       | -      | S-1*** | S-1*** | -      | -      | -      | -     | -      | -      | -      | -      | -      |
| D-06       | Full       | DLA       | -      | S-1*** | S-1*** | -      | S-1*** | -      | -     | -      | -      | -      | -      | -      |
| D-07       | Full       | DLA       | R-1*** | S-1*** | R-1*** | R-1*** | R-1*** | S-1*** | -     | R-1*** | S-1*** | R-1*** | -      | R-1*** |
| D-08       | Full       | DLA       | -      | S-1**  | -      | -      | -      | S-1**  | -     | -      | S-2**  | S-1**  | -      | -      |
| D-09       | Full       | DLA       | R-1*** | S-1*** | R-1*** | R-1*** | S-2*   | S-2*   | -     | R-1*** | S-2*   | -      | R-1*** | R-1*** |
| D-10       | Full       | DLA       | -      | S-1*** | S-1*** | -      | S-2**  | -      | -     | -      | -      | -      | -      | -      |
| D-11       | Full       | DLA       | -      | S-1*** | S-1*** | -      | S-2**  | -      | -     | -      | -      | -      | -      | -      |
| D-12       | Full       | DLA       | -      | -      | -      | S-2**  | S-1*** | S-1*** | -     | -      | -      | -      | -      | -      |
| D-13       | Indica     | LT        | -      | -      | -      | -      | -      | -      | -     | -      | -      | -      | -      | -      |
| D-14       | Full       | LT        | S-1*** | S-1*** | S-1*** | -      | S-1*** | S-1*** | -     | S-1*** | -      | S-1*** | -      | R-2*** |
| D-14       | Full       | DLA       | S-1*** | S-1*** | S-1*** | -      | S-1*** | S-1*** | -     | S-1*** | -      | S-1*** | -      | -      |
| D-14       | Indica     | LT        | -      | -      | -      | -      | -      | -      | -     | -      | -      | -      | -      | -      |
| D-15       | Full       | DLA       | -      | -      | -      | -      | -      | -      | -     | -      | -      | R-2*   | -      | -      |
| D-16       | Full       | DLA       | -      | S-2*** | -      | -      | -      | -      | -     | -      | -      | R-1*** | R-1*** | -      |

[illegible]

[illegible]

|            |            |           |        |        |        |        |        |        |        |        |        |        |        |
|------------|------------|-----------|--------|--------|--------|--------|--------|--------|--------|--------|--------|--------|--------|
| NSFTV ID   | 258        | 259       | 261    | 262    | 263    | 264    | 265    | 267    | 269    | 270    | 271    | 273    |        |
| Population | TRJ        | ADMIX     | AUS    | AUS    | TEJ    | ADMIX  | TEJ    | TEJ    | IND    | ADMIX  | ADMIX  | ADMIX  |        |
| D41-2_DLA  | 60.45      | 6.68      | 40.69  | 5.07   | 22.8   | 14.98  | -      | -      | 20.66  | 6.19   | 20.72  | 8.71   |        |
| 12YL_DLA   | 15.9       | 15.035    | 10.705 | 12.975 | 31.965 | 10.875 | 18.485 | 20.25  | 11.135 | 16.38  | 11.745 | 17     |        |
| D41-2_LT   | 8          | 2.3       | 8.3    | 2.3    | 9      | 6.3    | -      | -      | 3.7    | 6.3    | 8.3    | 5.7    |        |
| 12YL_LT    | 8          | 3         | 5      | 6      | 9      | 5      | 9      | 7      | 5      | 5      | 7      | 9      |        |
| QTL        | Population | Phenotype |        |        |        |        |        |        |        |        |        |        |        |
| D-01       | Indica     | LT        | -      | -      | -      | -      | R-1*** | -      | R-1*** | R-1*** | R-1*** | R-1*** | R-1*** |
| D-02       | Indica     | DLA       | -      | -      | S-1*   | -      | -      | -      | -      | S-1*   | -      | -      | S-1*   |
| D-03       | Full       | DLA       | -      | S-1**  | -      | -      | -      | -      | -      | -      | -      | -      | -      |
| D-04       | Full       | DLA       | -      | -      | -      | R-1*** | -      | S-1**  | S-1**  | -      | S-1**  | -      | -      |
| D-05       | Full       | DLA       | -      | -      | -      | -      | -      | -      | S-1*** | -      | -      | -      | S-1*** |
| D-06       | Full       | DLA       | -      | R-1*** | -      | R-1*** | S-1*** | -      | -      | -      | R-1*** | -      | -      |
| D-07       | Full       | DLA       | R-1*** | -      | -      | -      | S-1*** | S-1*** | R-1*** | S-1*** | -      | R-1*** | S-1*** |
| D-08       | Full       | DLA       | -      | R-1*   | -      | -      | S-1**  | -      | -      | S-1**  | S-2**  | -      | -      |
| D-09       | Full       | DLA       | R-1*** | R-1*** | -      | -      | S-2*   | R-1*** | S-2*   | S-1*** | S-2*   | R-1*** | R-1*** |
| D-10       | Full       | DLA       | -      | -      | -      | -      | S-1*** | S-1*** | S-1*** | -      | -      | -      | S-1*** |
| D-11       | Full       | DLA       | -      | R-1*** | -      | -      | S-1*** | -      | S-1*** | -      | -      | -      | -      |
| D-12       | Full       | DLA       | -      | -      | -      | R-1*** | -      | -      | S-1*** | -      | -      | -      | -      |
| D-13       | Indica     | LT        | -      | S-1*   | -      | S-1*   | -      | -      | -      | -      | -      | -      | -      |
| D-14       | Full       | LT        | S-1*** | R-3*   | -      | R-1*** | S-1*** | -      | S-1*** | S-1*** | -      | S-1*** | S-1*** |
| D-14       | Full       | DLA       | S-1*** | -      | -      | R-1*** | S-1*** | -      | S-1*** | S-1*** | -      | S-1*** | S-1*** |
| D-14       | Indica     | LT        | -      | -      | -      | R-1*** | -      | -      | -      | -      | -      | -      | -      |
| D-15       | Full       | DLA       | -      | -      | -      | R-1*** | -      | -      | -      | S-1*** | -      | -      | -      |
| D-16       | Full       | DLA       | -      | -      | -      | R-1*** | -      | -      | -      | S-1*   | -      | -      | -      |

|            |            |           |        |        |        |        |        |        |        |        |        |       |        |        |
|------------|------------|-----------|--------|--------|--------|--------|--------|--------|--------|--------|--------|-------|--------|--------|
| NSFTV ID   | 274        | 276       | 277    | 278    | 279    | 280    | 281    | 282    | 283    | 284    | 285    | 286   |        |        |
| Population | TRJ        | AUS       | TEJ    | ADMIX  | TEJ    | ADMIX  | TEJ    | TEJ    | TEJ    | IND    | TRJ    | TRJ   |        |        |
| D41-2_DLA  | 5.58       | 11.75     | 43.86  | 15.46  | 23.81  | 23.28  | 35.8   | 13.35  | 14.35  | 6.9    | 9.72   | 14.85 |        |        |
| 12YL_DLA   | -          | 8.235     | -      | -      | 18.285 | 13.685 | -      | -      | 8.495  | -      | 4.515  | -     |        |        |
| D41-2_LT   | 1.7        | 1         | 7.7    | 1.7    | 8.3    | 8.3    | 6.3    | 6      | 6.3    | 3      | 4.3    | 7     |        |        |
| 12YL_LT    | -          | 9         | -      | -      | 9      | 7      | -      | -      | 6      | -      | 1      | -     |        |        |
| QTL        | Population | Phenotype |        |        |        |        |        |        |        |        |        |       |        |        |
| D-01       | Indica     | LT        | R-1*** | -      | R-1*** | S-1*   | -      | R-1*** | R-1*** | R-1*** | -      | -     | -      | R-1*** |
| D-02       | Indica     | DLA       | -      | -      | S-1*   | -      | S-1*   | S-1*   | S-1*   | -      | -      | -     | S-1*   | -      |
| D-03       | Full       | DLA       | -      | -      | -      | -      | -      | -      | -      | -      | -      | -     | -      | -      |
| D-04       | Full       | DLA       | -      | -      | S-1**  | -      | S-1**  | S-1**  | S-1**  | S-2*   | S-2*   | -     | S-1**  | S-1**  |
| D-05       | Full       | DLA       | -      | -      | -      | -      | -      | -      | -      | -      | S-1*** | -     | R-4*** | -      |
| D-06       | Full       | DLA       | -      | -      | S-1*** | S-1*** | -      | S-1*** | -      | S-1*** | -      | -     | -      | -      |
| D-07       | Full       | DLA       | R-1*** | R-1*** | S-1*** | -      | S-1*** | -      | R-1*** | S-1*** | -      | -     | -      | R-1*** |
| D-08       | Full       | DLA       | -      | R-2*** | S-1**  | R-1*   | -      | -      | -      | -      | S-1**  | R-1*  | -      | -      |
| D-09       | Full       | DLA       | R-1*** | R-1*** | S-1*** | R-1*** | S-2*   | R-1*** | S-2*   | S-1*** | S-1*** | -     | R-1*** | -      |
| D-10       | Full       | DLA       | -      | -      | S-1*** | -      | S-2**  | -      | S-1*** | -      | -      | -     | -      | -      |
| D-11       | Full       | DLA       | -      | -      | S-1*** | -      | -      | -      | -      | -      | -      | -     | -      | -      |
| D-12       | Full       | DLA       | -      | -      | -      | -      | -      | -      | -      | -      | -      | -     | -      | -      |
| D-13       | Indica     | LT        | -      | -      | -      | -      | -      | -      | -      | -      | -      | -     | -      | -      |
| D-14       | Full       | LT        | -      | -      | S-1*** | S-1*** | -      | -      | S-1*** | S-1*** | -      | -     | S-1*** | -      |
| D-14       | Full       | DLA       | -      | -      | S-1*** | S-1*** | -      | -      | S-1*** | S-1*** | -      | -     | S-1*** | -      |
| D-14       | Indica     | LT        | -      | -      | -      | -      | -      | -      | -      | -      | -      | -     | -      | -      |
| D-15       | Full       | DLA       | -      | -      | -      | -      | -      | -      | -      | -      | -      | -     | -      | -      |
| D-16       | Full       | DLA       | -      | -      | -      | -      | -      | -      | S-1*   | -      | -      | -     | -      | -      |



|            |            |           |        |        |        |        |        |        |        |        |        |        |        |        |
|------------|------------|-----------|--------|--------|--------|--------|--------|--------|--------|--------|--------|--------|--------|--------|
| NSFTV ID   | 287        | 288       | 289    | 290    | 291    | 292    | 293    | 295    | 296    | 297    | 298    | 299    |        |        |
| Population | TEJ        | TEJ       | TEJ    | TEJ    | TEJ    | TEJ    | ADMIX  | TEJ    | TEJ    | TEJ    | IND    | IND    |        |        |
| D41-2_DLA  | 32.21      | 23.72     | 29.32  | 5.08   | 9.19   | 43.54  | 9.52   | 6.76   | 8.83   | 27.69  | 20.91  | 17.87  |        |        |
| 12YL_DLA   | 18.2       | 24.62     | 16.155 | -      | -      | 18.245 | 18.115 | 7.03   | 6.3    | 8.675  | 8.795  | 23.3   |        |        |
| D41-2_LT   | 8.3        | 8.3       | 8.3    | 5      | 6.3    | 9      | 2.3    | 6      | 6.3    | 6.3    | 3      | 7      |        |        |
| 12YL_LT    | 9          | 9         | 9      | -      | -      | 9      | 3      | 7      | 6      | 7      | 1      | 7      |        |        |
| QTL        | Population | Phenotype |        |        |        |        |        |        |        |        |        |        |        |        |
| D-01       | Indica     | LT        | -      | -      | R-1*** | R-1*** | R-1*** | R-1*** | -      | R-1*** | -      | R-1*** | -      | -      |
| D-02       | Indica     | DLA       | -      | -      | -      | -      | -      | -      | -      | -      | -      | S-1*   | -      | -      |
| D-03       | Full       | DLA       | -      | -      | -      | -      | -      | -      | -      | -      | -      | -      | -      | -      |
| D-04       | Full       | DLA       | -      | S-1**  | S-1**  | S-2*   | S-2*   | S-1**  | -      | S-2*   | S-1**  | S-1**  | -      | R-1*** |
| D-05       | Full       | DLA       | -      | -      | -      | S-1*** | S-1*** | -      | -      | S-1*** | -      | -      | -      | -      |
| D-06       | Full       | DLA       | -      | -      | -      | S-1*** | S-1*** | -      | R-1*** | -      | S-1*** | S-1*** | R-1*** | -      |
| D-07       | Full       | DLA       | S-1*** | -      | S-1*** | R-1*** | S-1*** | S-1*** | -      | -      | R-1*** | S-1*** | -      | -      |
| D-08       | Full       | DLA       | -      | S-2**  | S-2**  | S-1**  | -      | S-2**  | -      | -      | -      | S-1**  | -      | R-1*   |
| D-09       | Full       | DLA       | S-2*   | S-2*   | S-2*   | S-1*** | S-1*** | S-2*   | R-1*** | R-1*** | S-2*   | S-1*** | -      | -      |
| D-10       | Full       | DLA       | -      | -      | S-2**  | -      | -      | S-2**  | -      | S-1*** | -      | S-1*** | -      | -      |
| D-11       | Full       | DLA       | S-2**  | -      | S-2**  | S-1*** | -      | -      | -      | -      | -      | -      | -      | -      |
| D-12       | Full       | DLA       | -      | -      | -      | -      | -      | S-1*** | -      | -      | -      | S-1*** | -      | -      |
| D-13       | Indica     | LT        | -      | -      | -      | -      | -      | -      | -      | -      | -      | -      | R-1**  | -      |
| D-14       | Full       | LT        | -      | -      | S-1*** | S-1*** | -      | -      | -      | S-1*** | -      | -      | R-1*** | R-3*   |
| D-14       | Full       | DLA       | -      | -      | S-1*** | S-1*** | -      | -      | -      | S-1*** | -      | -      | R-1*** | -      |
| D-14       | Indica     | LT        | -      | -      | -      | -      | -      | -      | -      | -      | -      | -      | R-1*** | -      |
| D-15       | Full       | DLA       | -      | -      | S-2*   | -      | -      | -      | -      | -      | -      | -      | -      | -      |
| D-16       | Full       | DLA       | -      | S-2*** | -      | -      | -      | S-2*** | -      | -      | -      | -      | R-1*** | -      |

[illegible]

|            |            |           |       |        |       |        |        |        |        |        |        |        |        |        |
|------------|------------|-----------|-------|--------|-------|--------|--------|--------|--------|--------|--------|--------|--------|--------|
| NSFTV ID   | 313        | 314       | 315   | 316    | 317   | 318    | 319    | 320    | 321    | 322    | 324    | 325    |        |        |
| Population | IND        | AUS       | IND   | AUS    | AUS   | AUS    | AUS    | AUS    | AUS    | AUS    | AUS    | IND    |        |        |
| D41-2_DLA  | 16.82      | 5.71      | 10.96 | 11.09  | 7.61  | 34.53  | 5.21   | 38.43  | 3.73   | 8.78   | 7.35   | 12.16  |        |        |
| 12YL_DLA   | 3.015      | 4.98      | 8.22  | -      | 15.08 | 38.285 | -      | 20.09  | 17.1   | -      | 18.01  | 6.585  |        |        |
| D41-2_LT   | 4.7        | 3         | 5     | 5.7    | 3     | 7      | 5      | 7.7    | 2      | 1.7    | 5      | 1.7    |        |        |
| 12YL_LT    | 2          | 3         | 2     | -      | 5     | 9      | -      | 7      | 7      | -      | 6      | 1      |        |        |
| QTL        | Population | Phenotype |       |        |       |        |        |        |        |        |        |        |        |        |
| D-01       | Indica     | LT        | -     | -      | -     | -      | S-1*   | -      | -      | S-1*   | -      | -      | S-1*   | -      |
| D-02       | Indica     | DLA       | -     | -      | -     | -      | -      | -      | -      | S-2**  | -      | -      | -      | -      |
| D-03       | Full       | DLA       | -     | -      | -     | -      | -      | -      | -      | S-1**  | -      | -      | -      | -      |
| D-04       | Full       | DLA       | -     | -      | -     | R-1*** | R-1*** | -      | -      | -      | R-1*** | -      | -      | R-1*** |
| D-05       | Full       | DLA       | R-1*  | -      | -     | R-2*   | -      | -      | -      | -      | -      | -      | -      | R-1*   |
| D-06       | Full       | DLA       | -     | -      | -     | -      | -      | R-2**  | R-2**  | -      | R-1*** | R-1*** | R-1*** | R-1*** |
| D-07       | Full       | DLA       | -     | R-1*** | -     | R-1*** | R-1*** | R-1*** | R-1*** | -      | R-1*** | R-1*** | R-1*** | -      |
| D-08       | Full       | DLA       | R-1*  | -      | -     | R-2*** | R-2*** | R-2*** | R-2*** | -      | R-2*** | R-2*** | -      | R-1*   |
| D-09       | Full       | DLA       | -     | R-1*** | -     | R-1*** | R-1*** | R-1*** | R-1*** | -      | R-1*** | R-1*** | R-1*** | -      |
| D-10       | Full       | DLA       | -     | -      | -     | -      | -      | -      | -      | -      | -      | -      | -      | -      |
| D-11       | Full       | DLA       | -     | -      | -     | -      | R-2**  | -      | -      | -      | -      | -      | -      | -      |
| D-12       | Full       | DLA       | -     | -      | -     | -      | -      | -      | R-1*** | -      | -      | -      | -      | -      |
| D-13       | Indica     | LT        | -     | -      | -     | -      | R-1**  | S-1*   | R-1**  | -      | -      | R-1**  | -      | -      |
| D-14       | Full       | LT        | -     | -      | -     | -      | R-1*** | -      | R-1*** | S-1*** | R-1*** | -      | R-1*** | -      |
| D-14       | Full       | DLA       | -     | -      | -     | -      | R-1*** | -      | R-1*** | S-1*** | R-1*** | -      | R-1*** | -      |
| D-14       | Indica     | LT        | -     | -      | -     | -      | R-1*** | -      | R-1*** | -      | R-1*** | R-1*** | R-1*** | -      |
| D-15       | Full       | DLA       | -     | -      | -     | -      | R-1*** | R-1*** | -      | -      | R-1*** | -      | R-1*** | -      |
| D-16       | Full       | DLA       | -     | -      | -     | R-1*** | R-1*** | -      | R-1*** | -      | R-1*** | -      | -      | -      |

|            |            |           |        |        |       |        |        |        |        |        |        |        |        |        |
|------------|------------|-----------|--------|--------|-------|--------|--------|--------|--------|--------|--------|--------|--------|--------|
| NSFTV ID   | 326        | 327       | 328    | 329    | 330   | 331    | 333    | 334    | 335    | 336    | 337    | 338    |        |        |
| Population | AUS        | AUS       | AUS    | AUS    | AUS   | AUS    | TEJ    | TEJ    | ADMIX  | AUS    | IND    | TEJ    |        |        |
| D41-2_DLA  | -          | 8.8       | 29.28  | 38     | 22.32 | 48.51  | 16.49  | 24.88  | 28.52  | 5.85   | 35.52  | 11.81  |        |        |
| 12YL_DLA   | 20.335     | 24.94     | 11.365 | 19.335 | -     | 20.395 | 21.21  | -      | 18.26  | 25.315 | 23.15  | -      |        |        |
| D41-2_LT   | -          | 1.7       | 5.7    | 9      | 1.7   | 7.7    | 7.7    | 7.7    | 7.7    | 1.7    | 8.3    | 4.7    |        |        |
| 12YL_LT    | 9          | 9         | 6      | 6      | -     | 7      | 9      | -      | 8      | 7      | 9      | -      |        |        |
| QTL        | Population | Phenotype |        |        |       |        |        |        |        |        |        |        |        |        |
| D-01       | Indica     | LT        | -      | -      | -     | S-1*   | R-1*** | -      | R-1*** | -      | -      | -      | -      |        |
| D-02       | Indica     | DLA       | -      | S-2**  | -     | S-2**  | -      | S-2**  | -      | -      | -      | -      | -      |        |
| D-03       | Full       | DLA       | S-1**  | S-1**  | S-1** | S-1**  | -      | -      | -      | -      | -      | -      | -      |        |
| D-04       | Full       | DLA       | -      | -      | -     | -      | -      | -      | -      | -      | -      | -      | S-2*   |        |
| D-05       | Full       | DLA       | -      | -      | -     | -      | S-1*** | -      | -      | -      | -      | -      | S-1*** |        |
| D-06       | Full       | DLA       | -      | -      | -     | -      | -      | -      | -      | -      | -      | -      | S-1*** |        |
| D-07       | Full       | DLA       | R-1*** | -      | -     | -      | R-1*** | -      | -      | -      | R-1*** | -      | S-1*** |        |
| D-08       | Full       | DLA       | R-2*** | -      | -     | -      | R-2*** | -      | S-1**  | -      | -      | -      | S-1**  |        |
| D-09       | Full       | DLA       | R-1*** | -      | -     | -      | R-1*** | R-1*** | S-2*   | S-1*** | -      | R-1*** | R-1*** | S-1*** |
| D-10       | Full       | DLA       | -      | -      | -     | -      | -      | -      | -      | -      | -      | -      | -      |        |
| D-11       | Full       | DLA       | -      | -      | -     | R-2**  | -      | -      | -      | -      | -      | -      | -      |        |
| D-12       | Full       | DLA       | -      | R-1*** | -     | R-1*** | -      | -      | S-1*** | -      | -      | -      | -      |        |
| D-13       | Indica     | LT        | R-1**  | -      | S-1*  | S-1*   | S-1*   | -      | -      | -      | -      | -      | -      |        |
| D-14       | Full       | LT        | R-1*** | -      | -     | S-1*** | -      | -      | -      | -      | -      | R-3*   | S-1*** |        |
| D-14       | Full       | DLA       | R-1*** | -      | -     | S-1*** | -      | -      | -      | -      | -      | -      | S-1*** |        |
| D-14       | Indica     | LT        | R-1*** | -      | -     | -      | -      | -      | -      | -      | -      | -      | -      |        |
| D-15       | Full       | DLA       | -      | -      | -     | -      | -      | -      | -      | -      | -      | -      | -      |        |
| D-16       | Full       | DLA       | R-1*** | R-1*** | -     | -      | R-1*** | -      | -      | -      | -      | -      | -      |        |

[illegible]

|            |            |           |        |        |        |        |        |        |        |       |          |        |        |        |
|------------|------------|-----------|--------|--------|--------|--------|--------|--------|--------|-------|----------|--------|--------|--------|
| NSFTV ID   | 357        | 359       | 360    | 363    | 366    | 367    | 368    | 369    | 371    | 372   | 373      | 375    |        |        |
| Population | AUS        | AUS       | AUS    | TEJ    | TEJ    | ADMIX  | TEJ    | AUS    | AUS    | AUS   | AROMATIC | TRJ    |        |        |
| D41-2_DLA  | 6.28       | 17.96     | 2.36   | 25.49  | 18.98  | 35.69  | 21.67  | 12.57  | 11.02  | 14.53 | 15.69    | 14.86  |        |        |
| 12YL_DLA   | 11.31      | 5.63      | 15.67  | 27.335 | 13.435 | -      | 12.045 | 9.2    | 13.635 | 7.79  | 12.495   | 4.53   |        |        |
| D41-2_LT   | 2.3        | 3         | 1      | 7.7    | 6.3    | 3      | 8.3    | 8.3    | 4.7    | 8.3   | 2        | 2.3    |        |        |
| 12YL_LT    | 2          | 3         | 8      | 8      | 7      | -      | 9      | 3      | 2      | 3     | 3        | 5      |        |        |
| QTL        | Population | Phenotype |        |        |        |        |        |        |        |       |          |        |        |        |
| D-01       | Indica     | LT        | -      | -      | -      | -      | R-1*** | R-1*** | R-1*** | -     | -        | -      | R-1*** |        |
| D-02       | Indica     | DLA       | -      | -      | -      | -      | -      | -      | -      | S-1*  | -        | S-2**  | S-2**  | S-1*   |
| D-03       | Full       | DLA       | -      | -      | -      | -      | -      | -      | -      | S-1** | S-1**    | S-1**  | -      |        |
| D-04       | Full       | DLA       | -      | -      | -      | -      | S-2*   | S-1**  | S-2*   | -     | -        | R-1*** | -      | S-1**  |
| D-05       | Full       | DLA       | -      | -      | -      | -      | S-1*** | -      | S-1*** | -     | -        | -      | -      | -      |
| D-06       | Full       | DLA       | -      | R-1*** | -      | -      | -      | -      | -      | -     | R-1***   | R-1*** | -      | -      |
| D-07       | Full       | DLA       | R-1*** | -      | -      | S-1*** | S-1*** | R-1*** | S-1*** | -     | -        | -      | S-1*** | R-1*** |
| D-08       | Full       | DLA       | -      | R-2*** | -      | -      | S-1**  | S-1**  | S-1**  | -     | -        | R-2*** | -      | -      |
| D-09       | Full       | DLA       | -      | R-1*** | R-1*** | S-1*** | S-1*** | -      | S-1*** | -     | R-1***   | -      | S-2*   | R-1*** |
| D-10       | Full       | DLA       | -      | -      | -      | -      | S-1*** | -      | S-1*** | -     | -        | -      | -      | -      |
| D-11       | Full       | DLA       | -      | -      | -      | -      | S-1*** | -      | -      | -     | R-1***   | -      | -      | -      |
| D-12       | Full       | DLA       | R-1*** | -      | -      | -      | S-1*** | -      | -      | -     | -        | R-1*** | -      | -      |
| D-13       | Indica     | LT        | -      | -      | -      | -      | -      | -      | -      | S-1*  | S-1*     | S-1*   | S-1*   | -      |
| D-14       | Full       | LT        | -      | -      | -      | -      | S-1*** | S-1*** | -      | R-3*  | R-3*     | S-1*** | R-1*** | R-2*** |
| D-14       | Full       | DLA       | -      | -      | -      | -      | S-1*** | S-1*** | -      | -     | -        | S-1*** | R-1*** | -      |
| D-14       | Indica     | LT        | -      | -      | -      | -      | -      | -      | -      | -     | -        | -      | R-1*** | -      |
| D-15       | Full       | DLA       | -      | -      | -      | -      | -      | -      | -      | -     | R-1***   | -      | R-2*   | -      |
| D-16       | Full       | DLA       | -      | -      | -      | -      | S-1*   | -      | -      | -     | -        | -      | R-1*** | -      |

[illegible]

|            |            |           |        |        |        |        |        |        |        |        |        |        |        |        |
|------------|------------|-----------|--------|--------|--------|--------|--------|--------|--------|--------|--------|--------|--------|--------|
| NSFTV ID   | 395        | 396       | 397    | 616    | 618    | 619    | 620    | 621    | 622    | 623    | 624    | 625    |        |        |
| Population | TRJ        | TRJ       | TRJ    | IND    | ADMIX  | TRJ    | IND    | TRJ    | ADMIX  | IND    | TRJ    | TRJ    |        |        |
| D41-2_DLA  | 8.1        | 6.01      | 12.29  | 7.95   | 22.3   | 35.34  | 21.77  | 29.26  | 9.75   | 7.21   | 16.27  | 13.7   |        |        |
| 12YL_DLA   | 5.69       | -         | 3.61   | 4.53   | 12.105 | 12.02  | 8.725  | 19.07  | -      | -      | 5.015  | 2.175  |        |        |
| D41-2_LT   | 1          | 0.7       | 1.7    | 3.7    | 2.3    | 9      | 2.3    | 7      | 6      | 2.7    | 9      | 7      |        |        |
| 12YL_LT    | 3          | -         | 1      | 2      | 7      | 6      | 7      | 8      | -      | -      | 1      | 1      |        |        |
| QTL        | Population | Phenotype |        |        |        |        |        |        |        |        |        |        |        |        |
| D-01       | Indica     | LT        | R-1*** | -      | R-1*** | -      | -      | R-1*** | -      | R-1*** | R-1*** | -      | R-1*** | R-1*** |
| D-02       | Indica     | DLA       | S-1*   | S-1*   | S-1*   | -      | S-1*   | S-1*   | -      | S-1*   | S-1*   | -      | S-1*   | S-1*   |
| D-03       | Full       | DLA       | -      | -      | -      | -      | -      | -      | -      | -      | -      | -      | -      | -      |
| D-04       | Full       | DLA       | S-1**  | S-1**  | S-1**  | -      | -      | -      | -      | -      | -      | -      | S-1**  | S-1**  |
| D-05       | Full       | DLA       | -      | -      | -      | -      | -      | -      | -      | -      | -      | -      | -      | -      |
| D-06       | Full       | DLA       | -      | S-1*** | S-1*** | -      | -      | S-1*** | -      | -      | S-1*** | R-1*** | -      | S-1*** |
| D-07       | Full       | DLA       | -      | -      | R-1*** | R-1*** | R-1*** | R-1*** | -      | R-1*** | S-1*** | -      | R-1*** | R-1*** |
| D-08       | Full       | DLA       | -      | -      | -      | R-3**  | -      | -      | R-1*   | -      | S-1**  | R-1*   | -      | -      |
| D-09       | Full       | DLA       | R-1*** | R-1*** | R-1*** | R-1*** | R-1*** | R-1*** | R-1*** | R-1*** | R-1*** | R-1*** | R-1*** | R-1*** |
| D-10       | Full       | DLA       | -      | -      | -      | -      | -      | -      | -      | -      | -      | -      | -      | -      |
| D-11       | Full       | DLA       | -      | -      | -      | -      | -      | -      | -      | -      | -      | -      | -      | -      |
| D-12       | Full       | DLA       | -      | -      | -      | -      | -      | -      | -      | -      | -      | -      | -      | -      |
| D-13       | Indica     | LT        | -      | -      | -      | -      | -      | -      | -      | -      | -      | -      | -      | -      |
| D-14       | Full       | LT        | -      | S-1*** | -      | -      | -      | -      | R-1*** | S-1*** | S-1*** | S-1*** | -      | -      |
| D-14       | Full       | DLA       | -      | S-1*** | -      | -      | -      | -      | R-1*** | S-1*** | S-1*** | S-1*** | -      | -      |
| D-14       | Indica     | LT        | -      | -      | -      | -      | -      | -      | R-1*** | -      | -      | -      | -      | -      |
| D-15       | Full       | DLA       | -      | -      | -      | -      | -      | -      | -      | -      | -      | -      | -      | -      |
| D-16       | Full       | DLA       | -      | -      | -      | -      | -      | -      | -      | -      | S-1*   | -      | -      | -      |



[illegible]

|            |            |           |        |        |        |        |        |        |       |        |
|------------|------------|-----------|--------|--------|--------|--------|--------|--------|-------|--------|
| NSFTV ID   | 641        | 642       | 643    | 644    | 645    | 647    | 648    | 651    | 652   |        |
| Population | TEJ        | IND       | IND    | IND    | ADMIX  | TRJ    | IND    | AUS    | ADMIX |        |
| D41-2_DLA  | 19.06      | 9.91      | 6.04   | 21.5   | 7.01   | 16.57  | 13.59  | 9.11   | 42.15 |        |
| 12YL_DLA   | 38.01      | 5.175     | -      | 8.285  | -      | 14.255 | 3.085  | 17.915 | -     |        |
| D41-2_LT   | 7.7        | 3         | 6      | 9      | 7      | 3      | 7      | 2.3    | 8.3   |        |
| 12YL_LT    | 9          | 2         | -      | 1      | -      | 5      | 2      | 3      | -     |        |
| QTL        | Population | Phenotype |        |        |        |        |        |        |       |        |
| D-01       | Indica     | LT        | -      | -      | -      | -      | R-1*** | R-1*** | -     | -      |
| D-02       | Indica     | DLA       | -      | -      | -      | -      | S-1*   | S-1*   | -     | -      |
| D-03       | Full       | DLA       | -      | -      | -      | S-1**  | -      | -      | -     | S-1**  |
| D-04       | Full       | DLA       | S-2*   | R-1*** | -      | -      | S-1**  | S-1**  | -     | R-1*** |
| D-05       | Full       | DLA       | S-1*** | -      | -      | -      | -      | -      | -     | -      |
| D-06       | Full       | DLA       | S-1*** | R-1*** | R-1*** | R-1*** | S-1*** | S-1*** | -     | R-1*** |
| D-07       | Full       | DLA       | S-1*** | -      | -      | -      | S-1*** | R-1*** | -     | R-1*** |
| D-08       | Full       | DLA       | -      | -      | R-1*   | R-1*   | S-1**  | -      | -     | R-2*** |
| D-09       | Full       | DLA       | S-1*** | -      | R-1*** | R-1*** | S-1*** | R-1*** | -     | R-1*** |
| D-10       | Full       | DLA       | -      | -      | -      | -      | -      | -      | -     | -      |
| D-11       | Full       | DLA       | -      | -      | -      | -      | -      | -      | -     | -      |
| D-12       | Full       | DLA       | -      | -      | -      | -      | S-1*** | -      | -     | -      |
| D-13       | Indica     | LT        | -      | -      | -      | -      | -      | -      | -     | -      |
| D-14       | Full       | LT        | S-1*** | R-3*   | S-1*** | -      | R-2*** | S-1*** | -     | -      |
| D-14       | Full       | DLA       | S-1*** | -      | S-1*** | -      | -      | S-1*** | -     | -      |
| D-14       | Indica     | LT        | -      | -      | -      | -      | -      | -      | -     | -      |
| D-15       | Full       | DLA       | S-1*** | -      | -      | -      | -      | -      | -     | R-1*** |
| D-16       | Full       | DLA       | S-1*   | -      | -      | -      | -      | -      | -     | R-1*** |

<sup>a</sup>For each candidate QTL, the resistance and susceptibility haplotypes are denoted as R-number and S-number, respectively. Different numbers represent different haplotypes.

Asterisks indicate significant difference between the haplotype frequencies in cases and controls (\*0.01<P<0.05; \*\*0.001<P<0.01; \*\*\*P<0.001).
